# Supplementary material for: Whole-Plant Metabolic Allocation Under Water Stress
Source: PubMed Central journal article supplement (PMC6026660; doi:10.3389/fpls.2018.00852), 2018-06-25

Figure A1

# Drought

## A. Leaf

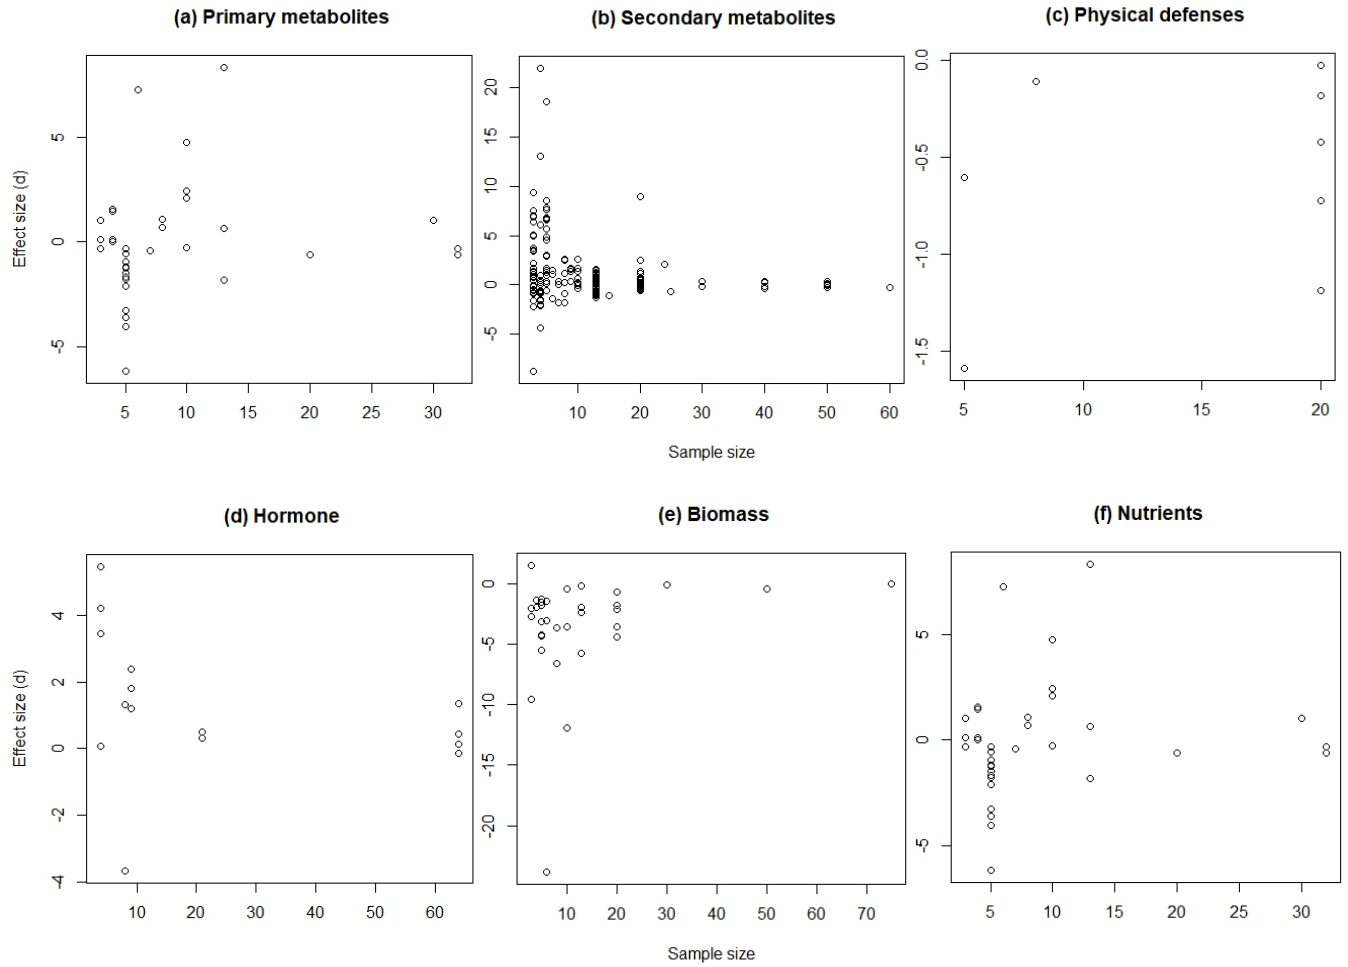

# Drought

## B. Root

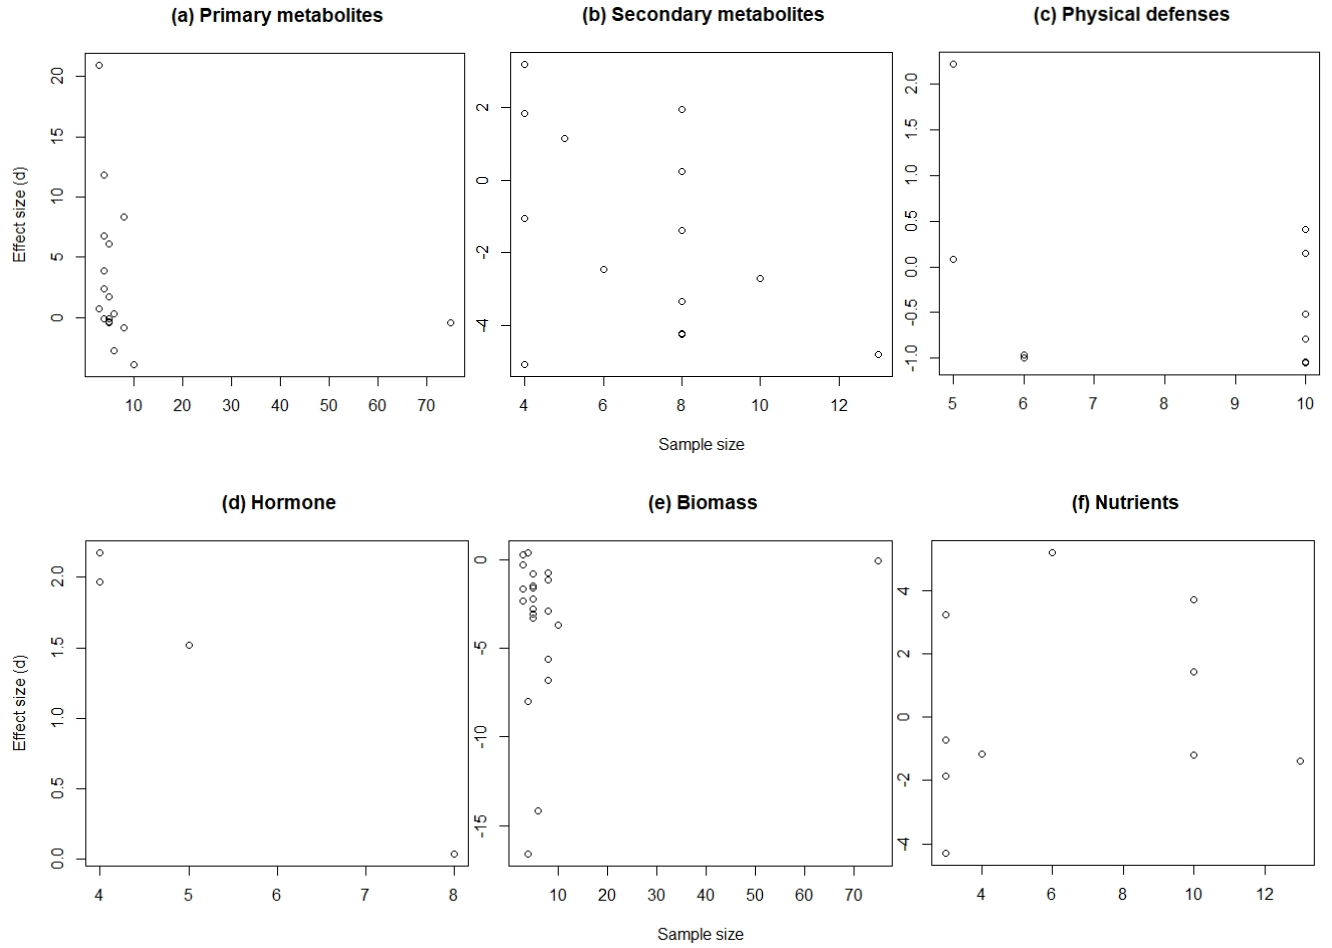

### C. Drought x Herbivory

#### Leaf

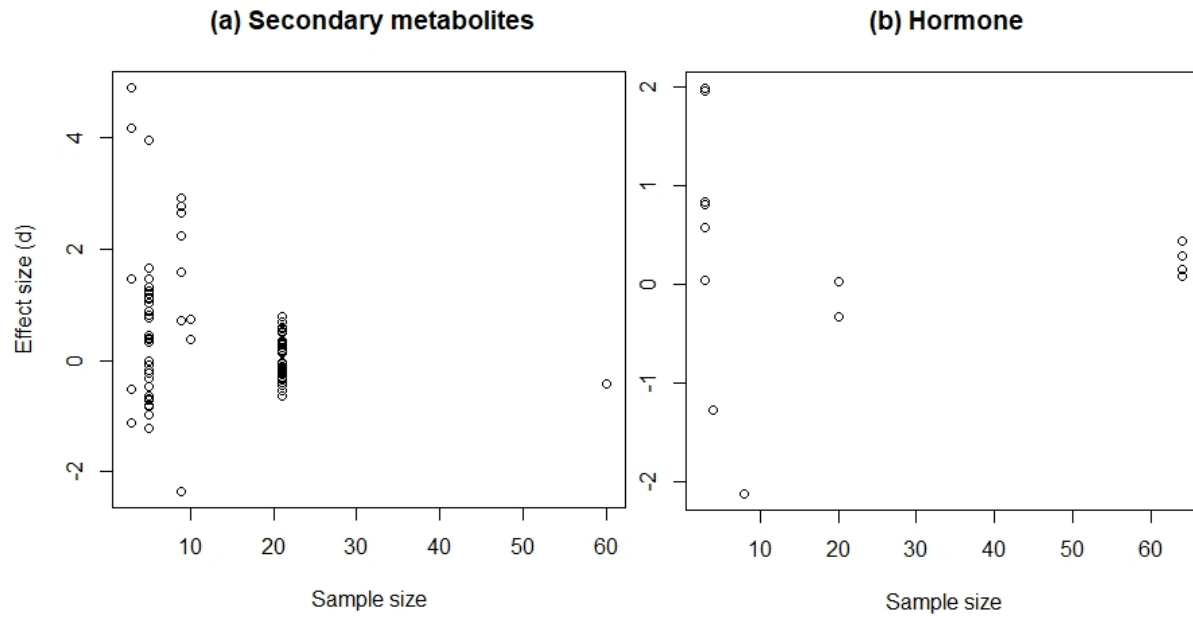

Supplement: Image_1.pdf [file Image_1.pdf]
